# Supplementary material
Source: PubMed Central journal article supplement (PMC10560944)
Supplement: ajcr0013-4163-f7.pdf [file ajcr0013-4163-f7.pdf]

# Reversion of chemoresistance by endocannabinoid in ovarian cancer

**Supplementary Table 1.** List of antibodies

| Antibody              | Manufacturer              | Catalog No.  |
|-----------------------|---------------------------|--------------|
| CB1                   | Santa Cruz                | #sc-293419   |
| CB2                   | Cayman                    | #101550      |
| Bip/Grp78             | Enzo Life Sciences        | #ADI-SPA-826 |
| CHOP                  | Cell Signaling Technology | #2895        |
| ATF6 $\alpha$         | Santa Cruz                | #sc-166659   |
| IRE1 $\alpha$         | Abcam                     | #ab3707      |
| Phospho-IRE1 $\alpha$ | Abcam                     | #ab48187     |
| eIF2 $\alpha$         | Cell Signaling Technology | #9722        |
| Phospho-eIF2 $\alpha$ | Cell Signaling Technology | #9721s       |
| LC3                   | Origene                   | #TA301542    |
| $\beta$ -actin        | Sigma                     | #A2066       |
| GAPDH                 | CROYEZ                    | #co6001      |

**Supplementary Table 2.** List of primers

| Primer        | Sequences (5'→3')       | Manufacturer | Catalog No. | Citation |
|---------------|-------------------------|--------------|-------------|----------|
| CNR1-Forward  | CTGTTCCCTCACAGCCATCGACA | Origene      | #HP227608   |          |
| CNR1-Reverse  | TGGCTATGGTCCACATCAGGCA  | Origene      | #HP227608   |          |
| CNR2-Forward  | TATGGGCATGTTCTCTGGAA    |              |             | [30]     |
| CNR2-Reverse  | GAGGAGCACAGCCAACACTA    |              |             | [30]     |
| GAPDH-Forward | GTCTCCTCTGACTTCAACAGCG  | Origene      | #HP205798   |          |
| GAPDH-Reverse | ACCACCCTGTGCTGTAGCCAA   | Origene      | #HP205798   |          |

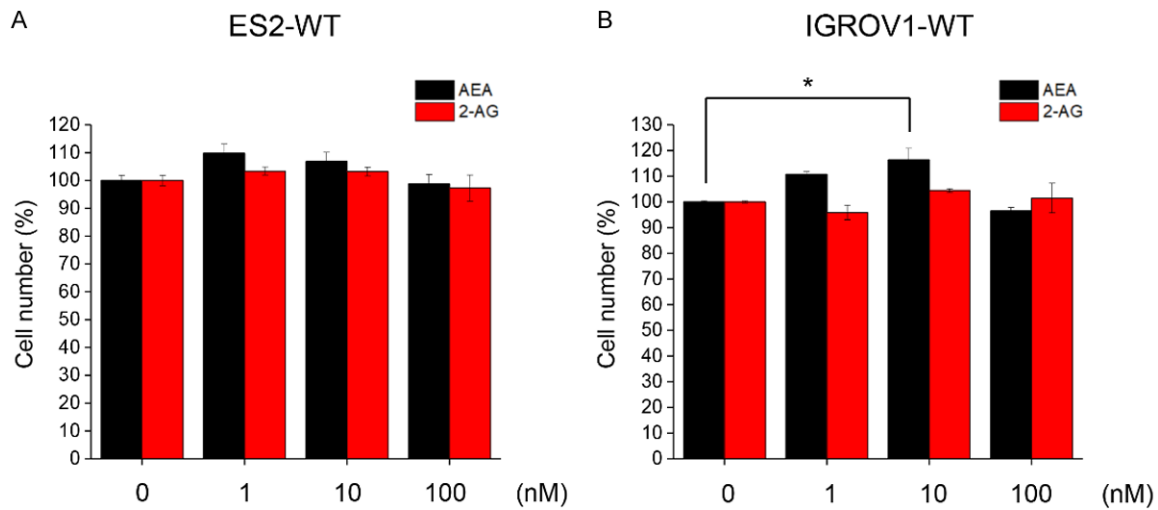

**Supplementary Figure 1.** Low concentration of endocannabinoid slightly promotes cancer cell proliferation. A, B. Both non-chemoresistant ES2 and IGROV1 cell lines were treated with 0-100 nM AEA or 2-AG for 48 h. The experiments were repeated for three times. Bars represent mean  $\pm$  SEM. \* $p < 0.05$  by one-way ANOVA.

# Reversion of chemoresistance by endocannabinoid in ovarian cancer

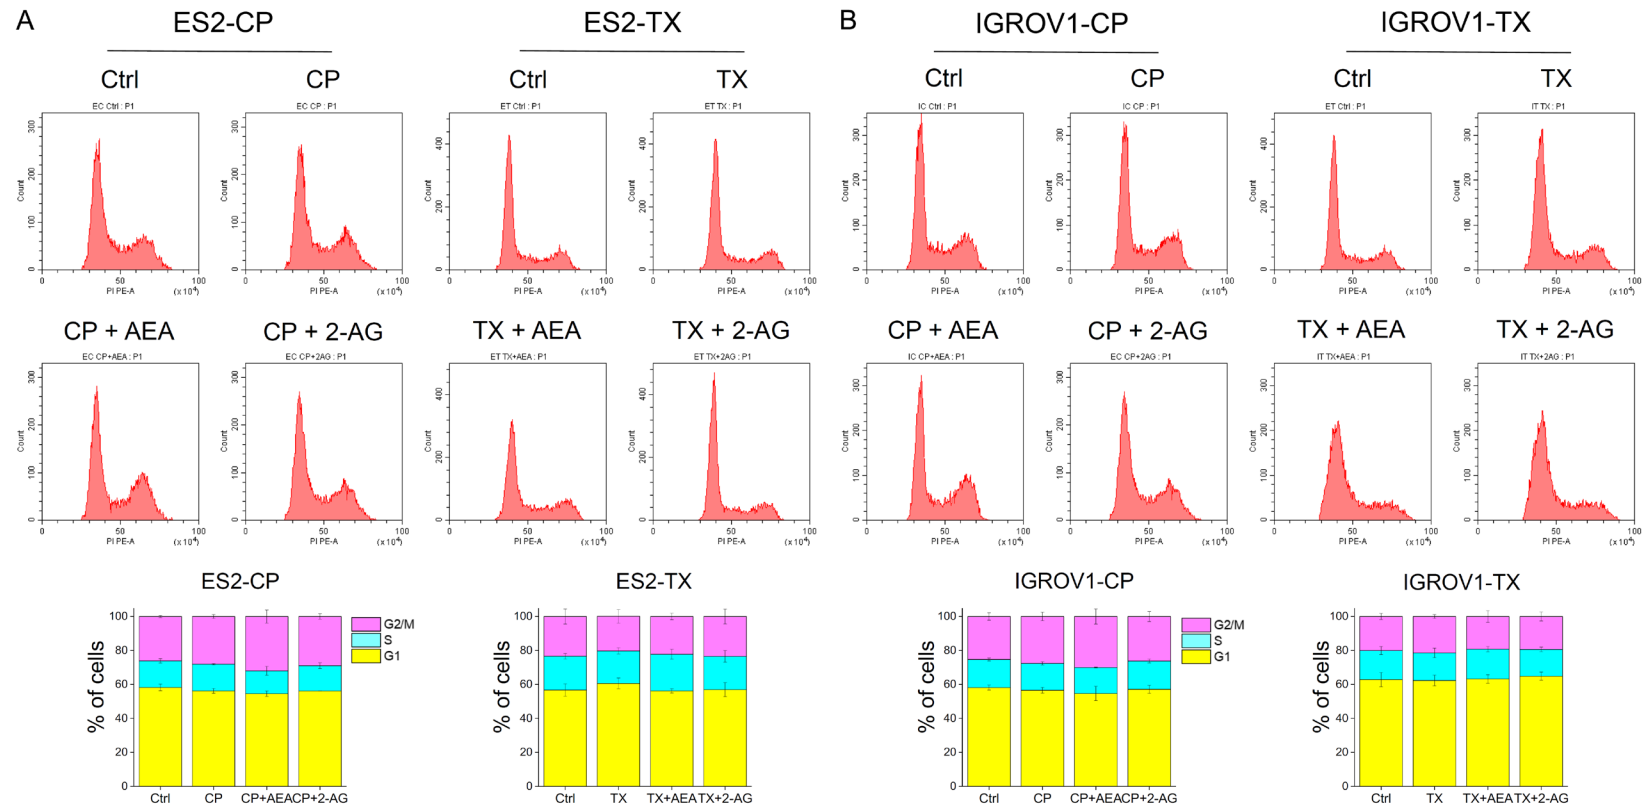

## Reversion of chemoresistance by endocannabinoid in ovarian cancer

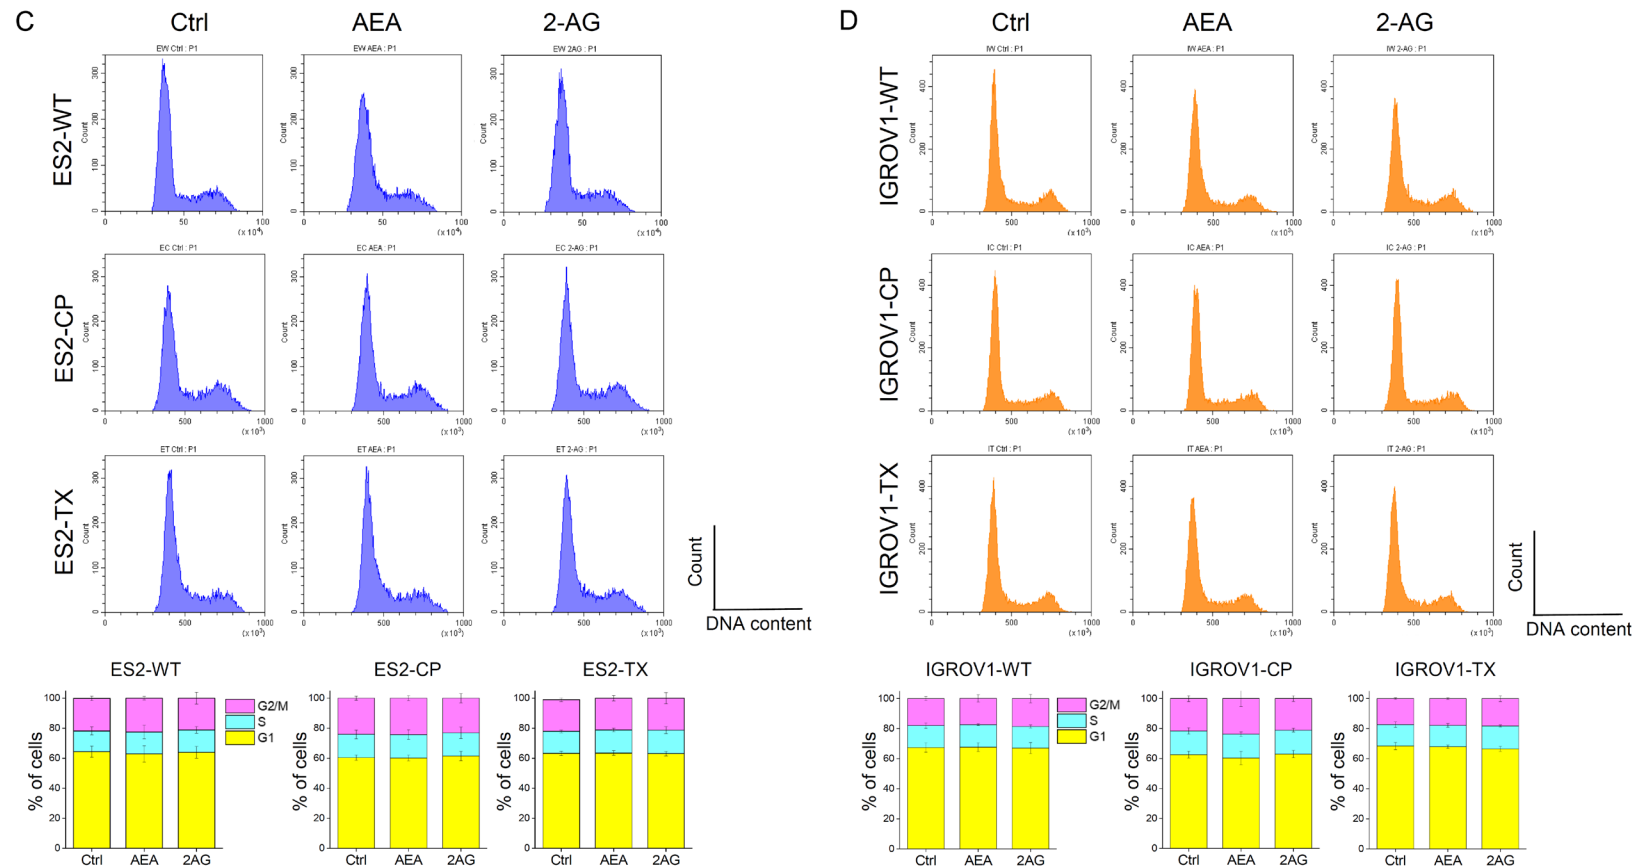

**Supplementary Figure 2.** Combined treatments or endocannabinoids alone do not arrest cell cycle in chemoresistant cancer cells. A, B. Upper panel: Representative images of cell cycle was shown. Cell cycle was examined by flow cytometry after 1  $\mu\text{M}$  cisplatin, 0.01  $\mu\text{g}/\text{mL}$  (for ES2-TX) or 0.1  $\mu\text{g}/\text{mL}$  (for IGROV1-TX) paclitaxel and IC<sub>30</sub> of AEA and 2-AG treatments. Cells were incubated with drugs for 24 h. Lower panel: The percentage of cells in each cell cycle phase (G1, S and G2/M phases) was analyzed from three independent experiments. The bars represent mean  $\pm$  SEM. C, D. Upper panel: 50  $\mu\text{M}$  AEA and 2-AG were treated to ES2 and IGROV1 cell lines for 24 h. Representative images from flow cytometry were shown. Lower panel: Quantification of the percentage of cells in each cell cycle was analyzed from three independent experiments. The bars represent mean  $\pm$  SEM.

## Reversion of chemoresistance by endocannabinoid in ovarian cancer

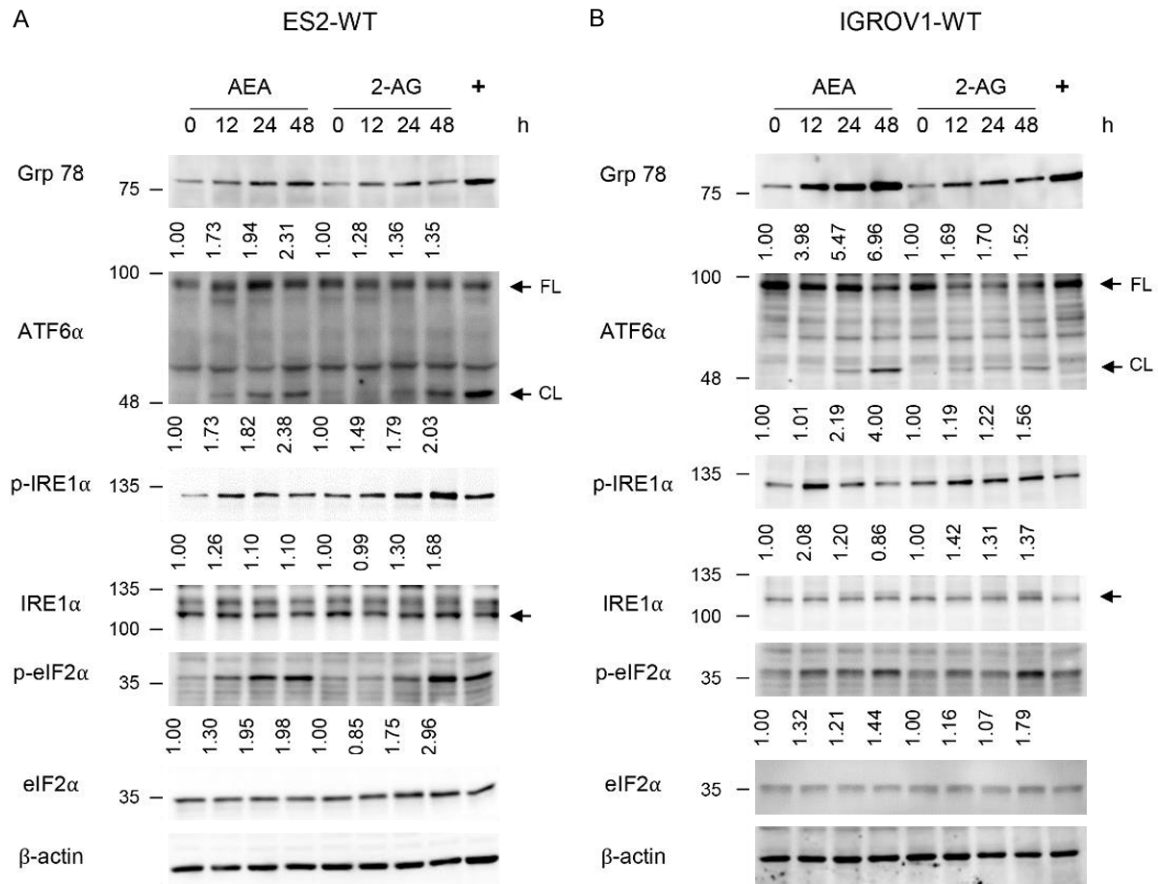

**Supplementary Figure 3.** Activation of ER stress in wild-type cancer cells under endocannabinoid treatments. A, B. Wild-type ES2 and IGROV1 cells were treated with  $IC_{50}$  of AEA and 2-AG for 12, 24 and 48 h. Antibodies against ER stress-related proteins, including Grp78, ATF6α, p-IRE1α, IRE1α, p-eIF2α and eIF2α were used in the immunoblotting analysis. 10 μg/mL tunicamycin was served as positive control (+) of ER stress. β-actin was served as the internal control. FL: full-length form, CL: cleaved form.

Reversion of chemoresistance by endocannabinoid in ovarian cancer

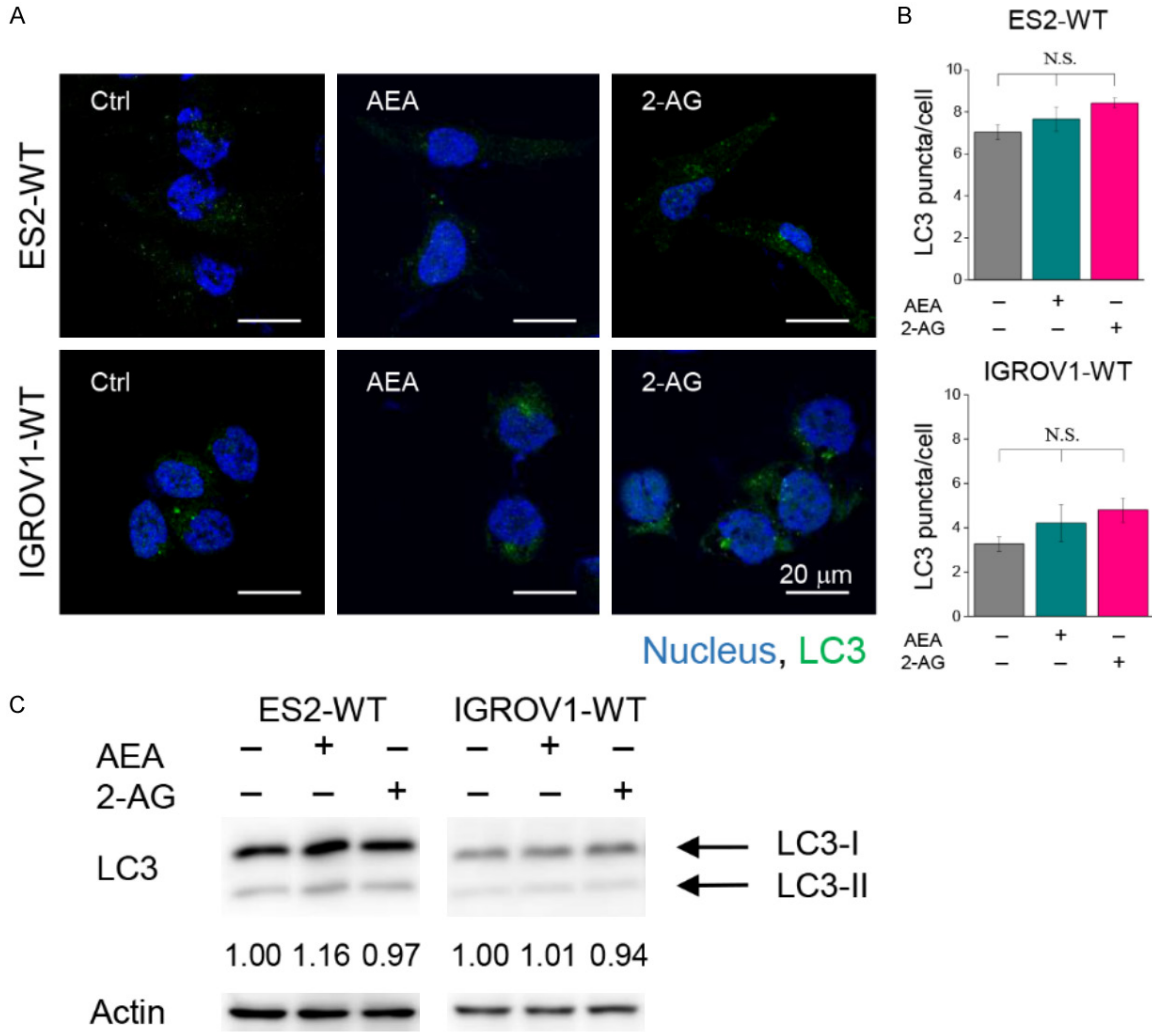

**Supplementary Figure 4.** Endocannabinoids do not enhance autophagy in non-chemoresistant wild-type cancer cells. A.  $IC_{30}$  of AEA and 2-AG were treated to ES2 and IGROV1 cell lines for 48 h. Autophagy was detected by LC3 antibody (green) and the nucleus was stained with Hoechst dye (blue). The images were taken by confocal microscopy. B. Quantification of LC3 puncta per cell from panel A was analyzed. The experiments were repeated for 3 times. Bars represent mean  $\pm$  SEM. C. Antibody against LC3 was used to detect autophagy under  $IC_{30}$  of AEA or 2-AG treatments in wild-type cell lines. Actin was served as internal control.

# Reversion of chemoresistance by endocannabinoid in ovarian cancer

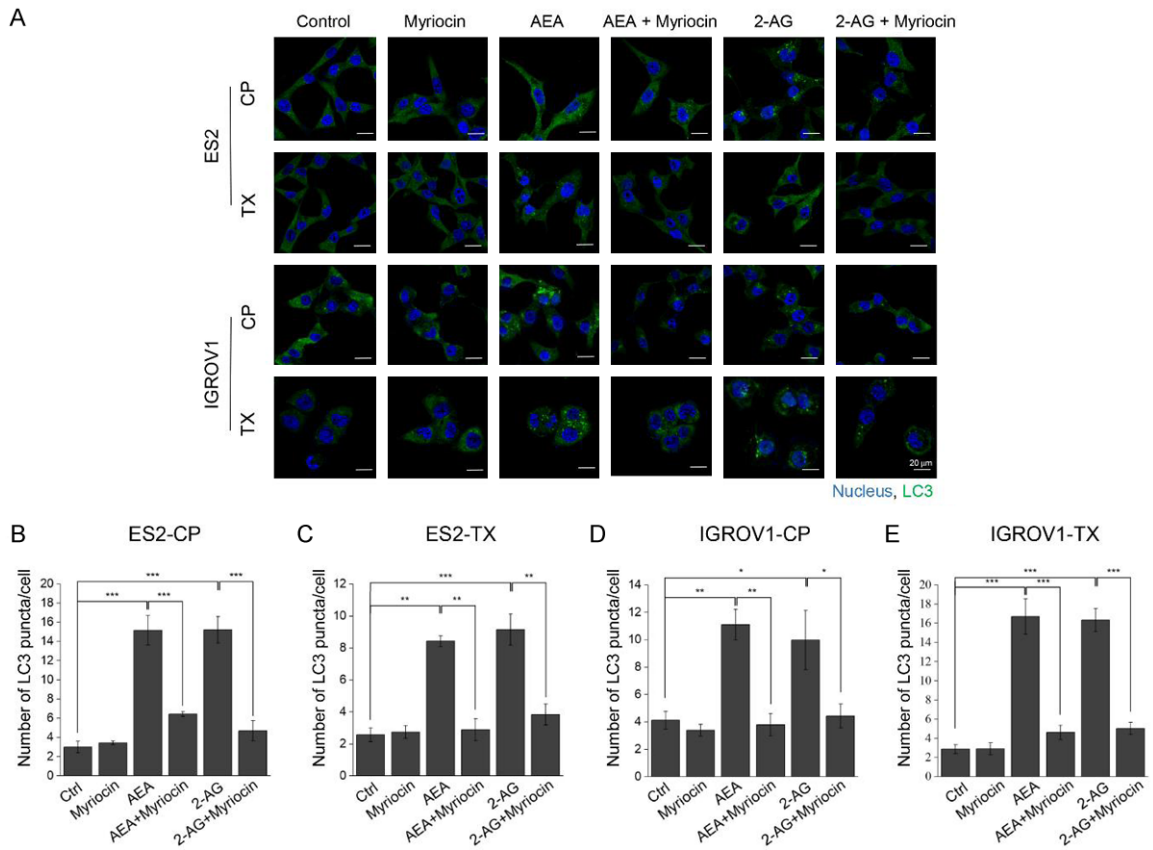

**Supplementary Figure 5.** Myriocin decreased LC3 expression in chemoresistant OVC. A. Representative images of LC3 expression in chemoresistant cancer cells treated with IC<sub>30</sub> of AEA or 2-AG for 24 h. 2 µM myriocin was pre-treated for 1 h. B-E. Quantification of the number of LC3 puncta per cell from panel A. The results were obtained from three independent experiments. The bars represent mean ± SEM. \* $p < 0.05$ , \*\* $p < 0.05$ , \*\*\* $p < 0.001$  by one-way ANOVA.

## Reversion of chemoresistance by endocannabinoid in ovarian cancer

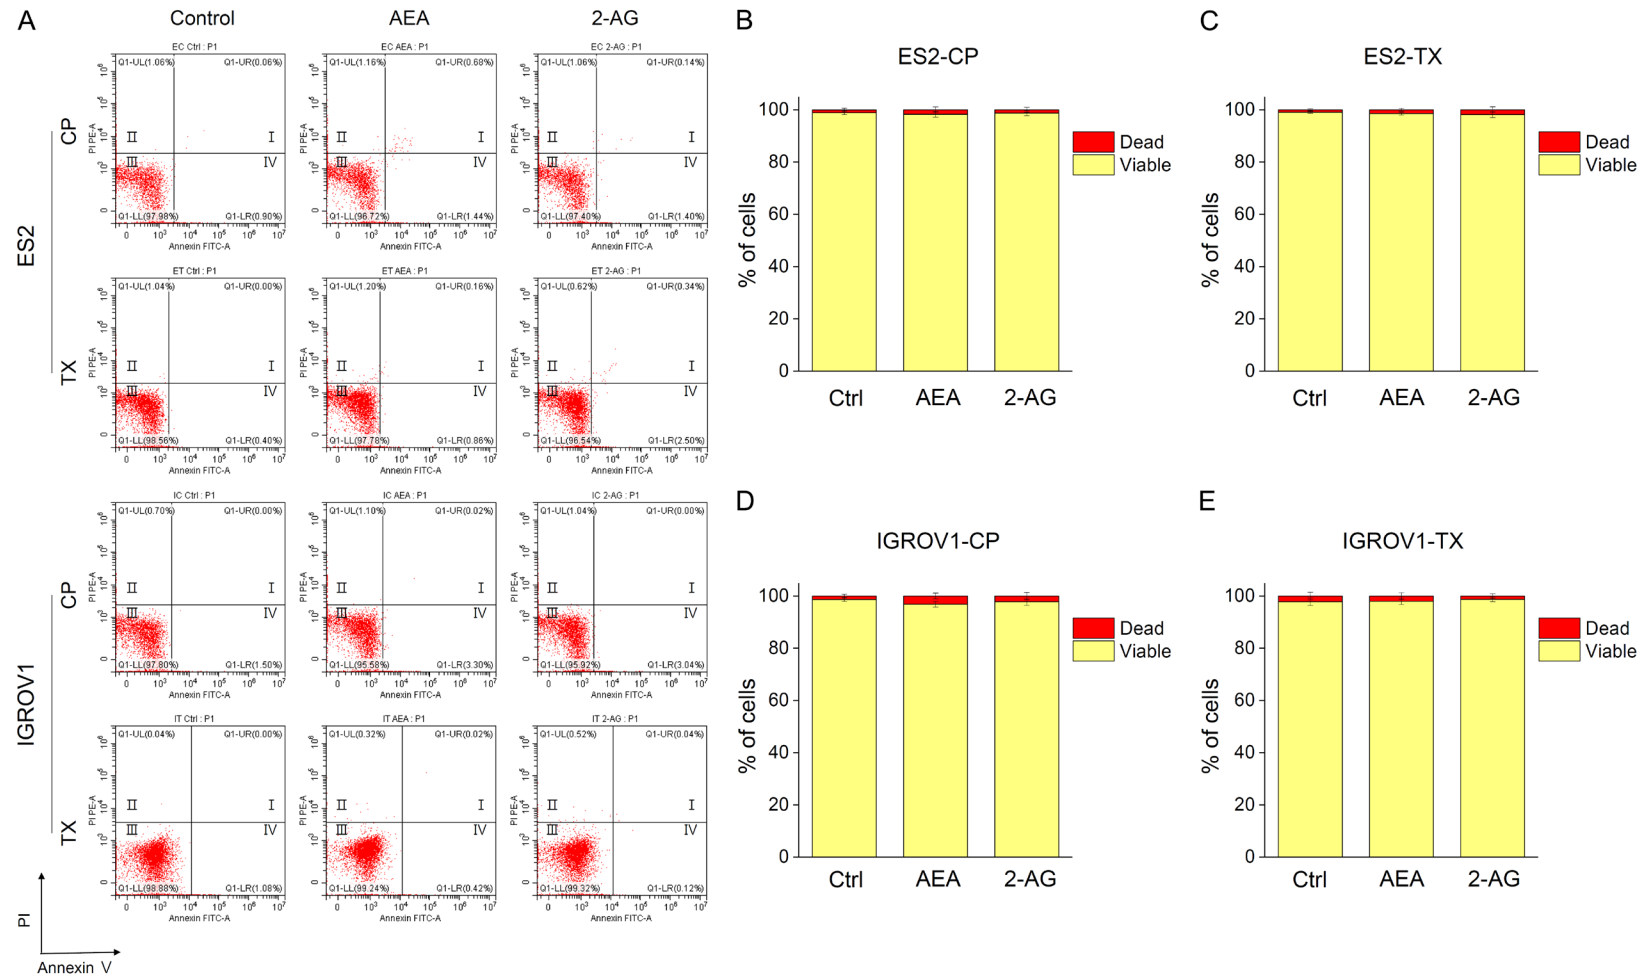

**Supplementary Figure 6.** Endocannabinoids alone do not induce cell apoptosis in chemoresistant cancer cells. A. Chemoresistant cancer cells were treated with IC<sub>30</sub> of AEA or 2-AG for 48 h. Annexin V and propidium iodide were used to quantify apoptosis. Representative images of flow cytometry were shown. B-E. Quantification of the percentage of dead cells, including necrotic and apoptotic cells, was analyzed from three independent experiments. The bars represent mean  $\pm$  SEM.
